# Supplementary material
Source: PubMed Central journal article supplement (PMC10962117)
Supplement: NIHMS1973051-supplement-SI.pdf [file NIHMS1973051-supplement-SI.pdf]

**Supplemental Information**  
**for**  
**Human Serum Alters the Metabolism and Antibiotic Susceptibility of**  
***Staphylococcus aureus***

Greg A. Somerville,<sup>2,\*</sup> Allison A. Parrett,<sup>1</sup> Joseph M. Reed<sup>2</sup> Stewart G. Gardner<sup>2</sup> and Martha Morton,<sup>1,3</sup>  
Robert Powers<sup>1,3,\*</sup>

<sup>1</sup>*Department of Chemistry, University of Nebraska-Lincoln, Lincoln NE 68588-0304*

<sup>2</sup>*School of Veterinary Medicine and Biomedical Sciences, University of Nebraska–Lincoln, Lincoln, NE  
68583*

<sup>3</sup>*Nebraska Center for Integrated Biomolecular Communication, University of Nebraska-Lincoln, Lincoln  
NE 68588-0304*

**Contents**

**Figure S1.** Representative 1D <sup>1</sup>H NMR spectra.

**Figure S2.** Representative 2D <sup>1</sup>H-<sup>13</sup>C HSQC NMR spectra.

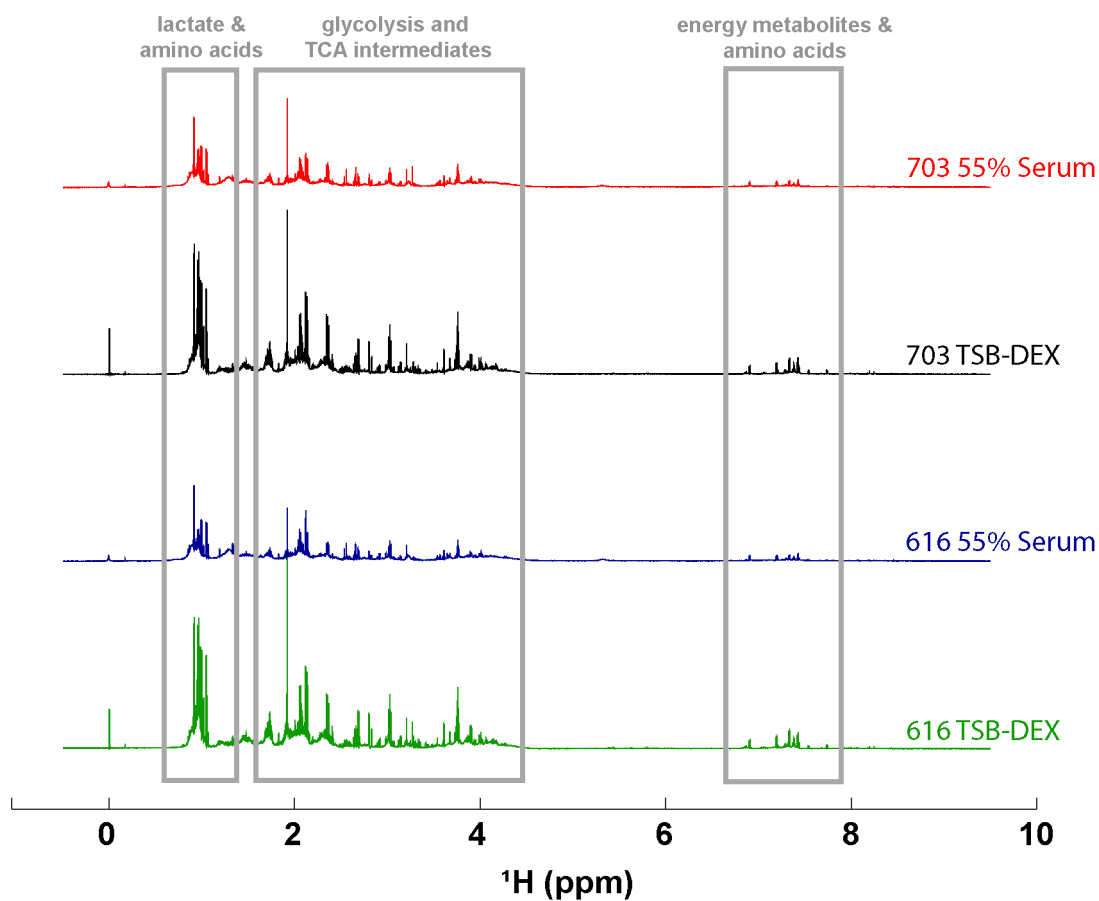

**Figure S1.** Representative 1D  $^1\text{H}$  NMR spectra. A stack plot depicting the extracted metabolome from 616 TSB-DEX cells cultivated in medium supplemented with (blue) and without (green) 55% serum, and the extracted metabolome from 703 TSB-DEX cells cultivated in medium supplemented with (red) and without (black) 55% serum. The boxes highlight spectral differences between the four groups that correspond to lactate and branching amino acids, glycolysis and TCA cycle, and energy metabolites and amino acids.

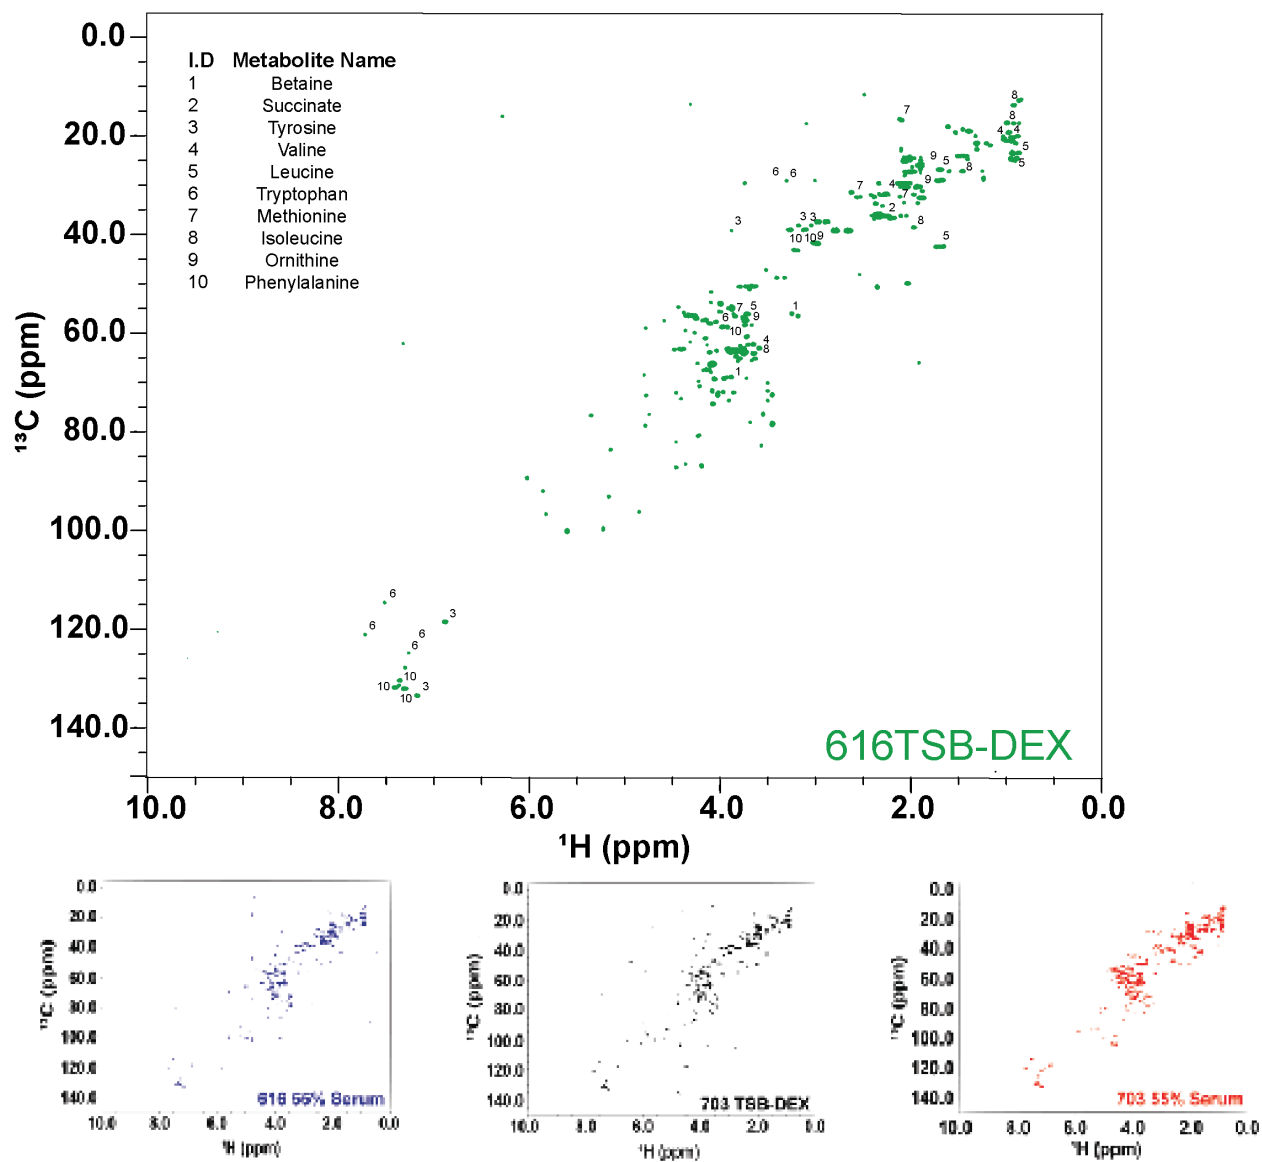

**Figure S2.** Representative 2D  $^1\text{H}$ - $^{13}\text{C}$  HSQC NMR spectra. A stack plot depicting the extracted metabolome from 616 TSB-DEX cells cultivated in medium supplemented with (blue) and without (green) 55% serum, and the extracted metabolome from 703 TSB-DEX cells cultivated in medium supplemented with (red) and without (black) 55% serum treatment. The top ten metabolite from Figure 4 are labeled.
